# Supplementary material
Source: publisher site journal article supplement (https://www.dovepress.com/article/430636)
Supplement: Supplementary file 1 [file get_supplementary_file.php]

**Supplementary Table S1-S4**

**Supplementary Table S1 Discrete choice test gender subgroup results analysis**

| **Characteristic factors** | **Level** | **Male（n=100）** | | | **Female（n=116）** | | |
| --- | --- | --- | --- | --- | --- | --- | --- |
| **β** | **P** | **95%CI** | **β** | **P** | **95%CI** |
| Length of service | Within 1h/day | 0.615 | 0.004 | （0.202，1.029） | 0.525 | 0.009 | （0.134,0.917） |
| 1-2h/day | 0.540 | 0.006 | （0.155，0.924） | 0.365 | 0.052 | （-0.004,0.734） |
| More than 2h/day | - | - | - | - | - | - |
| Time limit for response | Have a time limit | 0.083 | 0.740 | （-0.406，0.572） | -0.299 | 0.209 | （-0.766,0.167） |
| No time limit | - | - | - | - | - | - |
| Information security | Confidentiality of treatment information | 0.669 | ＜0.001 | （0.324，1.014） | 0.675 | ＜0.001 | （0.349,1.001） |
| Disclosure of treatment information | - | - | - | - | - | - |
| Subjects of treatment | General population | 0.425 | 0.010 | （0.101，0.749） | 0.521 | 0.001 | （0.212,0.829） |
| Priority groups | - | - | - | - | - | - |
| Treatment Pattern | Photo and text presentation | -0.071 | 0.715 | （-0.45，0.308） | 0.319 | 0.087 | （-0.047,0.685） |
| Audio presentation | 0.060 | 0.794 | （-0.393，0.514） | 0.349 | 0.111 | （-0.080,0.777） |
| Video presentation | - | - | - | - | - | - |
| Financial compensation | - | 0.005 | 0.005 | （0.002，0.009） | 0.004 | 0.029 | （0.000,0.007） |
| Const | – | -0.046 | 0.919 | （-0.925,0.834） | 0.095 | 0.822 | （-0.737,0.928） |

**Supplementary Table S2 Analysis of results of discrete choice test marital status subgroups**

| **Characteristic factors** | **Level** | **Unmarried (n=36)** | | | **Married (n=180)** | | |
| --- | --- | --- | --- | --- | --- | --- | --- |
| **β** | **P** | **95%CI** | **β** | **P** | **95%CI** |
| Length of service | Within 1h/day | 0.741 | 0.067 | (-0.053,1.534) | 0.542 | 0.001 | (0.234,0.850) |
| 1-2h/day | 1.122 | 0.010 | (0.272,1.972) | 0.377 | 0.009 | (0.093,0.661) |
| More than 2h/day | - | - | - | - | - | - |
| Time limit for response | Have a time limit | - 0.888 | 0.104 | (-1.958,0.182) | -0.037 | 0.842 | (-0.397,0.324) |
| No time limit | - | - | - | - | - | - |
| Information security | Confidentiality of treatment information | 0.544 | 0.102 | (-0.107,1.195) | 0.716 | ＜0.001 | (0.461,0.972) |
| Disclosure of treatment information | - | - | - | - | - | - |
| Subjects of treatment | General population | 1.209 | ＜0.001 | (0.583,1.835) | 0.368 | 0.003 | (0.126,0.609) |
| Priority groups | - | - | - | - | - | - |
| Treatment Pattern | Photo and text presentation | -0.496 | 0.257 | (-1.352,0.361) | 0.193 | 0.177 | (-0.088,0.475) |
| Audio presentation | -0.117 | 0.799 | (-1.020,0.786) | 0.227 | 0.184 | (-0.108,0.563) |
| Video presentation | - | - | - | - | - | - |
| Financial compensation | - | 0.013 | 0.003 | (0.004,0.021) | 0.004 | 0.009 | (0.001,0.006) |
| Const | – | 1.820 | 0.069 | (-0.141,3.782) | -0.188 | 0.570 | (-0.836,0.461) |

**Supplementary Table S3** **Analysis of subgroup results of discrete choice test professional titles**

| **Characteristic factors** | **Level** | **Junior (n=32)** | | | **Intermediate (n=160)** | | | **Deputy Senior (n=20)** | | |
| --- | --- | --- | --- | --- | --- | --- | --- | --- | --- | --- |
| **β** | **P** | **95%CI** | **β** | **P** | **95%CI** | **β** | **P** | **95%CI** |
| Length of service | Within 1h/day | 0.508 | 0.191 | (-0.253, 1.269) | 0.617 | ＜0.001 | (0.290, 0.944) | 1.086 | 0.166 | (-0.451, 2.622) |
| 1-2h/day | 0.531 | 0.174 | (-0.234, 1.297) | 0.390 | 0.011 | (0.088, 0.692) | 2.422 | 0.011 | (0.553, 4.291) |
| More than 2h/day | - | - | - | - | - | - | - | - | - |
| Time limit for response | Have a time limit | -0.557 | 0.254 | (-1.513, 0.399) | -0.072 | 0.712 | (-0.456, 0.312) | -0.732 | 0.486 | (-2.788, 1.325) |
| No time limit | - | - | - | - | - | - | - | - | - |
| Information security | Confidentiality of treatment information | 0.873 | 0.008 | (0.229, 1.517) | 0.666 | ＜0.001 | (0.395, 0.937) | 1.083 | 0.068 | (-0.082, 2.247) |
| Disclosure of treatment information | - | - | - | - | - | **-** | **-** | **-** | **-** |
| Subjects of treatment | General population | 0.513 | 0.093 | (-0.086, 1.113) | 0.436 | 0.001 | (0.179, 0.692) | 1.392 | 0.019 | (0.233, 2.552) |
| Priority groups | - | - | - | - | - | - | - | - | - |
| Treatment Pattern | Photo and text presentation | -0.093 | 0.808 | (-0.842, 0.656) | 0.218 | 0.154 | (-0.082, 0.517) | -1.519 | 0.090 | (-3.275, 0.237) |
| Audio presentation | 0.467 | 0.282 | (-0.383, 1.317) | 0.219 | 0.229 | (-0.138, 0.575) | -1.571 | 0.093 | (-3.404, 0.263) |
| Video presentation | - | - | - | - | - | - | - | - | - |
| Financial compensation | - | 0.010 | 0.011 | (0.002, 0.017) | 0.004 | 0.017 | (0.001, 0.006) | 0.022 | 0.025 | (0.003, 0.040) |
| Const | – | 1.009 | 0.243 | (-0.686, 2.703) | -0.246 | 0.485 | (-0.936, 0.445) | 3.600 | 0.100 | (-0.684, 7.884) |

**Supplementary Table S4** **Discrete choice test department subgroup results analysis**

| **Characteristic factors** | **Level** | **Internal Medicine (n=96)** | | | **Surgery (n=72)** | | | **Gynecology (n=8)** | | | **Others (n=32)** | | |
| --- | --- | --- | --- | --- | --- | --- | --- | --- | --- | --- | --- | --- | --- |
| **β** | **P** | **95%CI** | **β** | **P** | **95%CI** | **β** | **P** | **95%CI** | **β** | **P** | **95%CI** |
| Length of service | Within 1h/day | 0.196 | 0.366 | (-0.229, 0.621) | 0.988 | ＜0.001 | (0.461, 1.516) | 0.010 | 0.990 | (-1.577, 1.597) | 1.000 | 0.011 | (0.227, 1.773) |
| 1-2h/day | -0.157 | 0.434 | (-0.548, 0.235) | 1.085 | ＜0.001 | (0.560, 1.610) | 1.125 | 0.152 | (-0.414, 2.665) | 1.120 | 0.003 | (0.382, 1.857) |
| More than 2h/day | - | - | - | - | - | - | - | - | - | - | - | - |
| Time limit for response | Have a time limit | 0.163 | 0.518 | (-0.332, 0.659) | 0.027 | 0.938 | (-0.641, 0.694) | -1.705 | 0.109 | (-3.792, 0.382) | -1.345 | 0.005 | (-2.274, -0.416) |
| No time limit | - | - | - | - | - | - | - | - | - | - | - | - |
| Information security | Confidentiality of treatment information | 0.721 | ＜0.001 | (0.366, 1.076) | 0.864 | ＜0.001 | (0.421, 1.306) | 0.736 | 0.252 | (-0.523, 1.996) | 0.465 | 0.148 | (-0.165, 1.094) |
| Disclosure of treatment information | - | - | - | - | - | - | - | - | - | - | - | - |
| Subjects of treatment | General population | 0.596 | 0.001 | (0.254, 0.939) | 0.770 | ＜0.001 | (0.356, 1.184) | -0.008 | 0.989 | (-1.193, 1.176) | -0.003 | 0.993 | (-0.592, 0.587) |
| Priority groups | - | - | - | - | - | - | - | - | - | - | - | - |
| Treatment Pattern | Photo and text presentation | 0.599 | 0.003 | (0.211, 0.987) | -0.487 | 0.058 | (-0.991, 0.017) | -0.276 | 0.714 | (-1.758, 1.205) | 0.358 | 0.342 | (-0.379, 1.095) |
| Audio presentation | 0.710 | 0.003 | (0.211, 0.987) | -0.421 | 0.161 | (-1.009, 0.167) | -0.835 | 0.353 | (-2.596, 0.927) | 0.380 | 0.373 | (-0.456, 1.215) |
| Video presentation | - | - | - | - | - | - | - | - | - | - | - | - |
| Financial compensation | - | 0.004 | 0.037 | (0.000, 0.008) | 0.006 | 0.022 | (0.001,0.011) | 0.018 | 0.028 | (0.002, 0.035) | 0.006 | 0.082 | (-0.001, 0.014) |
| Const | – | -0.441 | 0.331 | (-1.331, 0.449) | 0.268 | 0.661 | (-0.929, 1.465) | 2.751 | 0.133 | (-0.840, 6.342) | 0.992 | 0.240 | (-0.663, 2.648) |
